# Supplementary material for: Temperature dependence of oxygen reduction activity at Nafion-coated Pt/graphitized carbon black catalysts prepared by the nanocapsule method
Source: Royal Society of Chemistry journal article supplement (doi:10.1039/c0ee00106f), 2010-01-01
Supplement: c0ee00106f.pdf [file c0ee00106f.pdf]

## **Electronic Supplementary Information**

### **Temperature Dependence of Oxygen Reduction Activity at Nafion-Coated Pt/Graphitized Carbon Black Catalysts Prepared by the Nanocapsule Method**

Hiroshi Yano<sup>a</sup>, Tomohiro Akiyama<sup>b</sup>, Hiroyuki Uchida<sup>\*a,c</sup> and Masahiro Watanabe<sup>\*a</sup>

<sup>a</sup>*Fuel Cell Nanomaterials Center*, <sup>b</sup>*Interdisciplinary Graduate School of Medicine and Engineering*,

<sup>c</sup>*Clean Energy Research Center, University of Yamanashi, 4 Takeda, Kofu 400-8510, Japan*

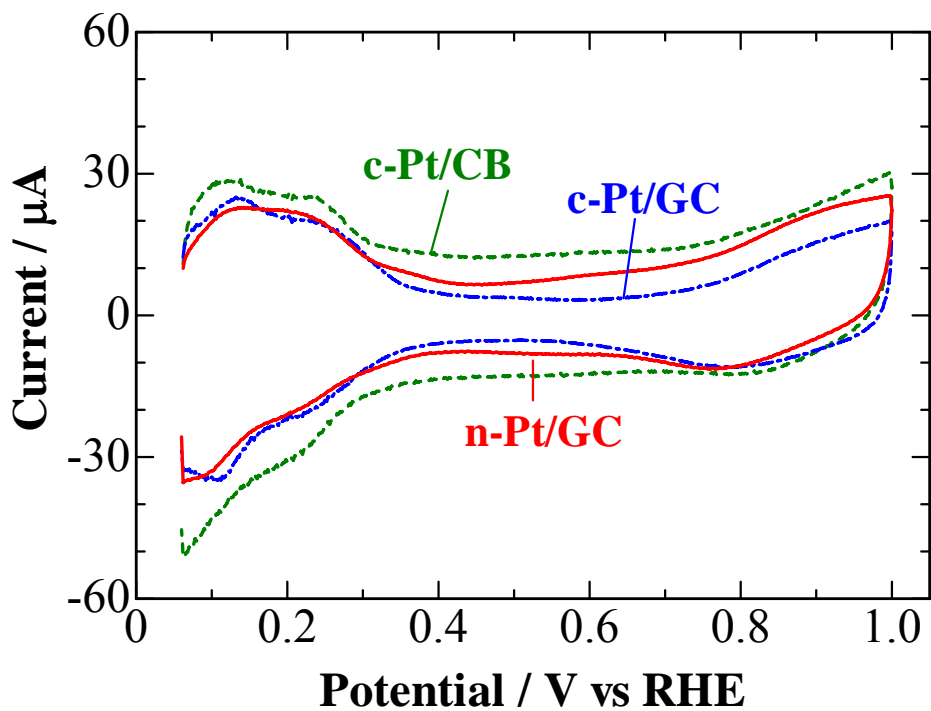

**Fig. S1** Cyclic voltammograms on Nafion-coated n-Pt/GC, c-Pt/GC and c-Pt/CB electrodes in 0.1M HClO<sub>4</sub> solution purged with N<sub>2</sub> at 30°C. Potential sweep rate = 0.1 V/s. The values of electrochemical active surface area (*S*) evaluated from the electrical charge for the hydrogen desorption wave  $Q_H$  were 0.16 cm<sup>2</sup> (n-Pt/GC), 0.25 cm<sup>2</sup> (c-Pt/GC), and 0.21 cm<sup>2</sup> (c-Pt/CB).

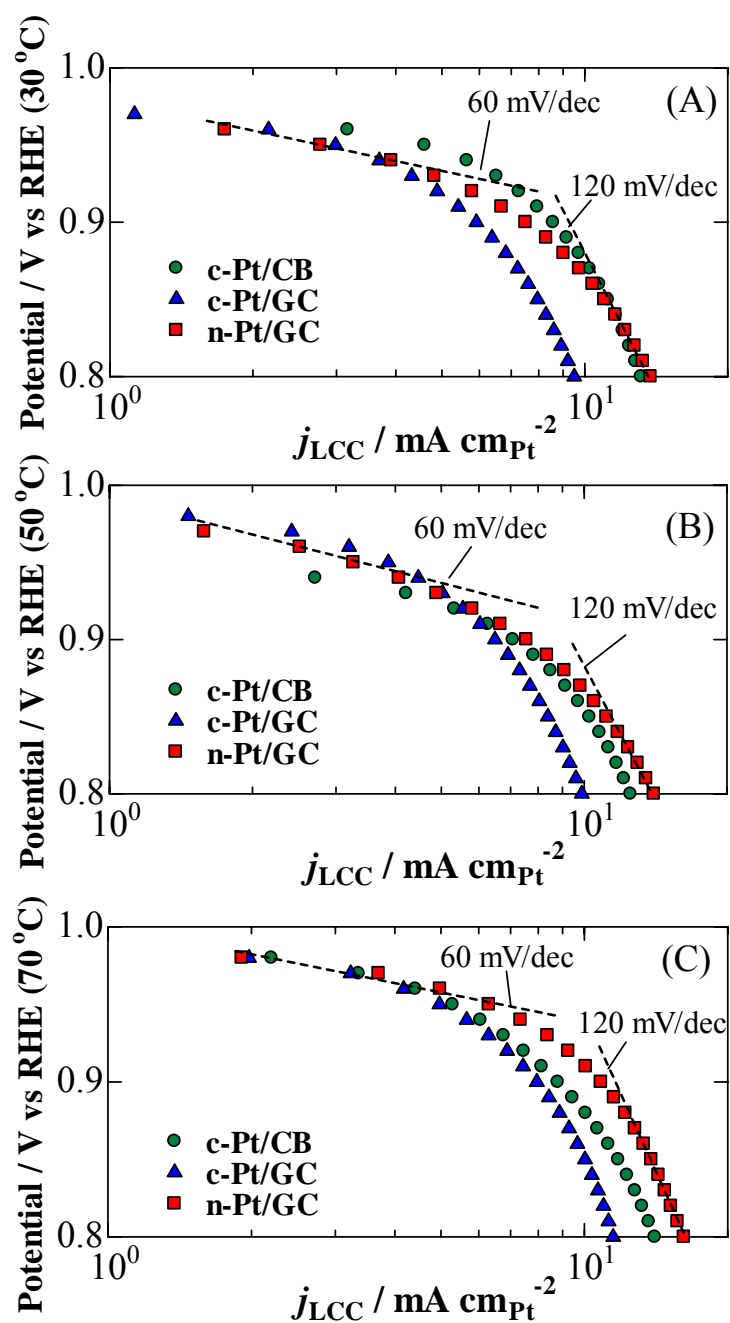

**Fig. S2** Tafel plots [ $E$  vs  $\log j_{LCC}$ ] for the ORR at Nafion-coated n-Pt/GC, c-Pt/GC and c-Pt/CB electrodes at (A) 30 °C, (B) 50 °C, and (C) 70 °C obtained from hydrodynamic voltammograms for ORR in  $\text{O}_2$  saturated 0.1 M  $\text{HClO}_4$  solution.  $j_{LCC}$  is  $I_L \times I / S(I - I_L)$ , where  $I_L$  is the limiting current,  $I$  is the current given at each potential, and  $S$  is the electrochemical active surface area. Mean flow rate of electrolyte solution  $U_m = 15 \text{ cm s}^{-1}$ .

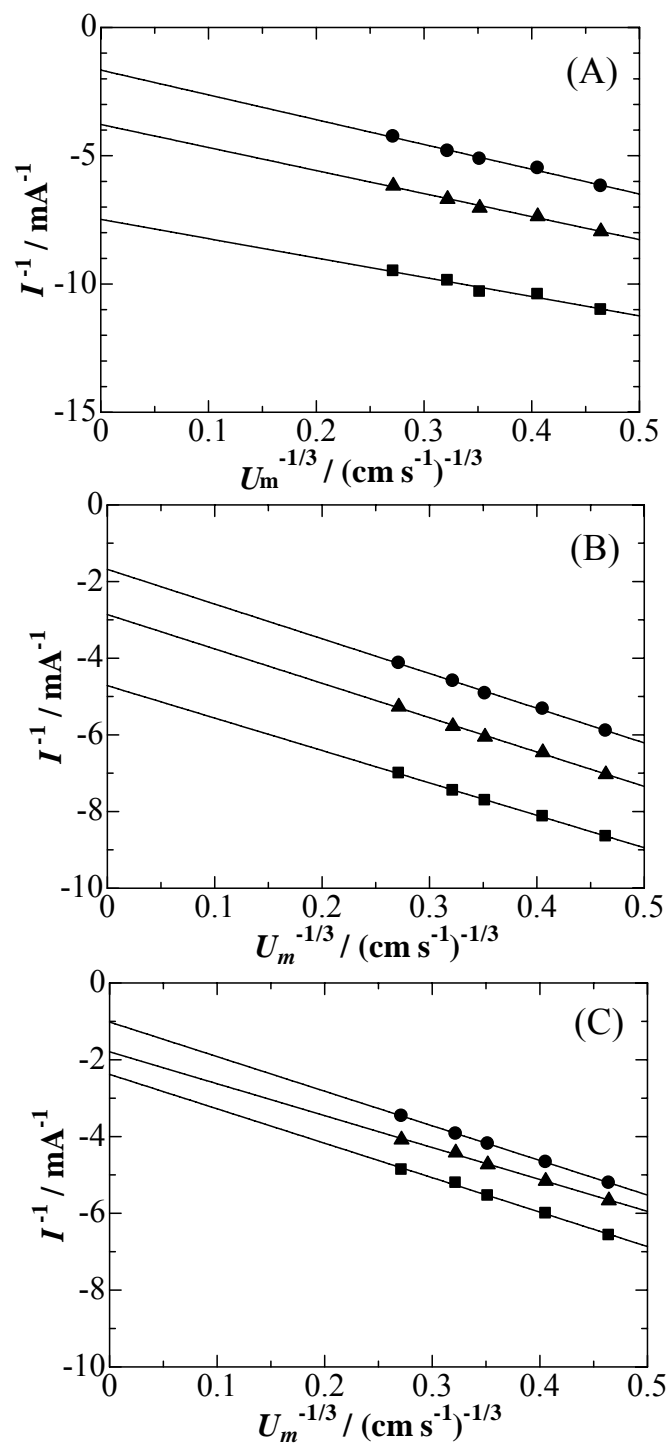

**Fig. S3**  $I^{-1}$  vs  $U_m^{-1/3}$  plots obtained from hydrodynamic voltammograms for the ORR at (■) 0.80, (▲) 0.76, and (●) 0.70 V vs RHE on (A) n-Pt/GC, (B) c-Pt/GC, and (C) c-Pt/CB electrodes in  $O_2$ -saturated 0.1 M  $HClO_4$  solution at 30 °C.

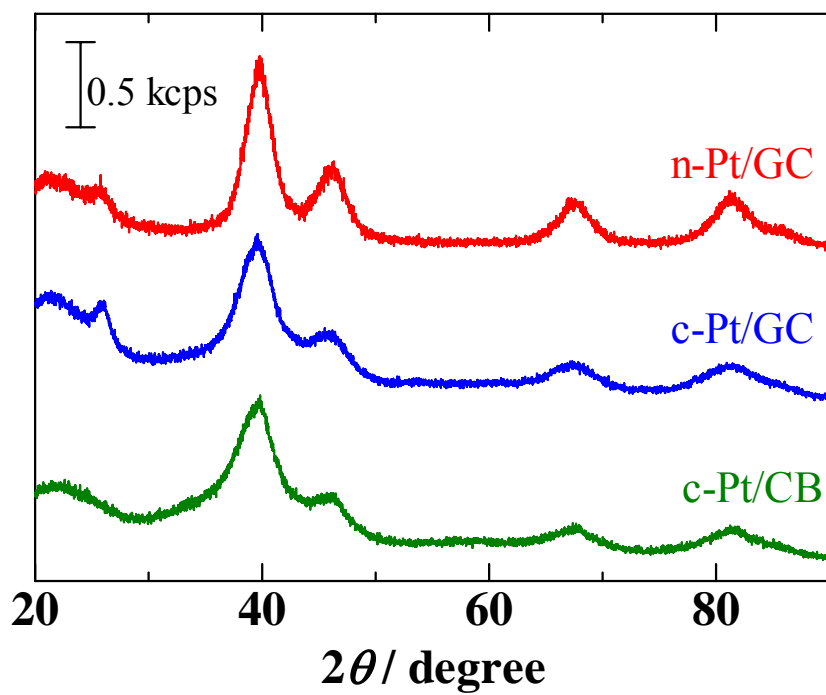

**Fig. S4** X-ray diffraction patterns of pristine powders of n-PtGC, c-Pt/GC, and c-Pt/CB catalyst.

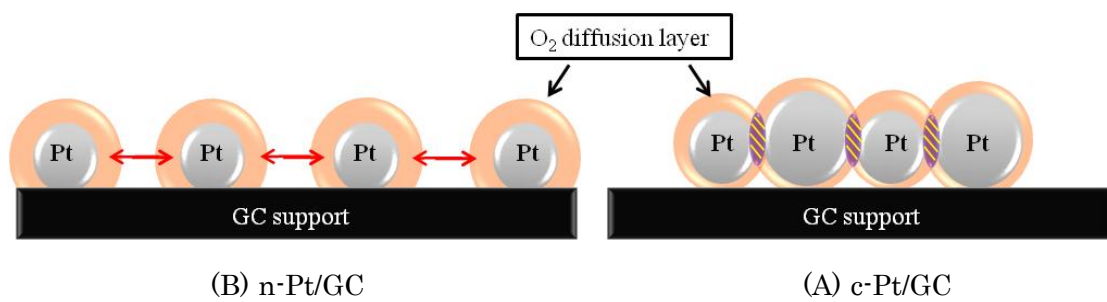

**Fig. S5** Illustration of “territories” (radial diffusion fields) of (A) n-Pt/GC and (B) c-Pt/GC catalyst particle relating to the reactant O<sub>2</sub>.
